# Supplementary material for: Molecular and functional properties of human Plasmodium falciparum CSP C‐terminus antibodies
Source: PubMed Central journal article supplement (PMC10245032; doi:10.15252/emmm.202317454), 2023-04-21
Supplement: EMMM-15-e17454-s006.pdf [file EMMM-15-e17454-s006.pdf]

# **Molecular and functional properties of human *Plasmodium falciparum* CSP**

## **C-terminus antibodies**

Opeyemi Ernest Oludada<sup>1,2</sup>, Giulia Costa<sup>3</sup>, Clare Burn Aschner<sup>4</sup>, Anna S. Obraztsova<sup>1,2</sup>, Katherine Prieto<sup>4</sup>, Caterina Canetta<sup>1</sup>, Stephen L. Hoffman<sup>5</sup>, Peter G. Kremsner<sup>6,7</sup>, Benjamin, Mordmüller<sup>6,8</sup>, Rajagopal Murugan<sup>1\*</sup>, Jean-Philippe Julien<sup>4,9\*</sup>, Elena A. Levashina<sup>3\*</sup>, and Hedda Wardemann<sup>1\*</sup>

<sup>1</sup>B Cell Immunology, German Cancer Research Center, Heidelberg, Germany

<sup>2</sup>Biosciences Faculty, University of Heidelberg, Germany

<sup>3</sup>Max Planck Institute for Infection Biology, Berlin, Germany

<sup>4</sup>The Hospital for Sick Children Research Institute, Toronto, Canada

<sup>5</sup>Sanaria Inc., Rockville, MD 20850, USA

<sup>6</sup>Institute of Tropical Medicine, Tübingen, Germany

<sup>7</sup>Centre de Recherches de Lambaréné (CERMEL), Lambaréné, Gabon

<sup>8</sup>Radboud University Medical Center, Nijmegen, The Netherlands

<sup>9</sup>Departments of Biochemistry and Immunology, University of Toronto, Toronto, Canada

\*equal contribution

Correspondence: Hedda Wardemann (h.wardemann@dkfz.de), Elena A. Levashina (levashina@mpiib-berlin.mpg.de), Jean-Philippe Julien (jean-philippe.julien@sickkids.ca)

## TABLE OF CONTENT

**Appendix Table S1:** Amino acid (aa) sequences of PfCSP antigens used in ELISAs

**Appendix Table S2:** Sequenced and cloned antibodies per time-point

**Appendix Table S3:** Epitope specificity and 7G8 cross-reactivity pattern of C-CSP specific mAbs

**Appendix Table S4:** Live sporozoites binding and hepatocyte traversal inhibition

**Appendix Table S5:** Statistical analysis for *in vivo* protection of 1961 mAb against mosquito bite challenge infection (Fig 4F).

**Appendix Table S6:** X-ray crystallography data collection and refinement data



|     |                 |
|-----|-----------------|
| P10 | RIKPGSANKPKDEL  |
| P11 | KPKDEL DYANDIEK |
| P12 | ANDIEK KICKMEKC |
| P13 | CKMEKCSSVFNVVN  |
| P14 | MEKCSSVFNVVNSS  |

**Appendix Table S2:** Sequenced and cloned antibodies per time-point

|       | PfCSP Memory B cells |        |                   |        | Plasmablasts         |        |
|-------|----------------------|--------|-------------------|--------|----------------------|--------|
|       | Sequenced antibodies |        | Cloned antibodies |        | Sequenced antibodies |        |
| Donor | III+14               | III+35 | III+14            | III+35 | III+14               | III+35 |
| M1    | 67                   | 107    | 24                | 23     | 67                   | NA     |
| M2    | 25                   | 35     | 4                 | 13     | 53                   | NA     |
| M3    | 41                   | 36     | 13                | 12     | 216                  | 196    |
| M4    | 213                  | 134    | 26                | 26     | 129                  | 136    |
| M5    | 43                   | NA     | 10                | -      | 144                  | NA     |
| M6    | NA                   | 37     | -                 | 12     | NA                   | NA     |
| M7    | 29                   | 14     | 11                | 5      | 177                  | 119    |
| M8    | NA                   | 34     | -                 | 9      | NA                   | 86     |
| M9    | 22                   | 10     | 5                 | 1      | 342                  | 184    |
| M10   | 24                   | 73     | 9                 | 15     | 140                  | NA     |
| M11   | NA                   | 46     | -                 | 8      | NA                   | NA     |
| M12   | 132                  | 50     | 29                | 12     | 147                  | 244    |

**Appendix Table S3:** Epitope specificity and 7G8 cross-reactivity pattern of C-CSP specific mAbs

| mAbs | Affinity | NF54 C-CSP binding (ELISA AUC) after blocking with the indicated mAbs |          | 7G8 FL-CSP binding |
|------|----------|-----------------------------------------------------------------------|----------|--------------------|
|      |          | mAb 1710                                                              | mAb 1512 | ELISA AUC          |
| 3393 | 5.11E-10 | 15.48                                                                 |          | 1                  |
| 1805 | 1.41E-09 | 21.54                                                                 |          | 1.3                |
| 4192 | 2.77E-09 | 18.35                                                                 |          | 0.8                |
| 3667 | 3.49E-09 | 22.46                                                                 |          | 1.4                |
| 3666 | 5.50E-09 | 50.69                                                                 |          | 2.9                |
| 0566 | 5.70E-09 | 18.1                                                                  |          | 0.6                |
| 2801 | 5.74E-09 | 42.07                                                                 |          | 0.6                |
| 4595 | 6.40E-09 | 19.76                                                                 |          | 10.1               |
| 1593 | 8.00E-09 | 19.72                                                                 |          | 0.5                |
| 2889 | 9.28E-09 | 18.09                                                                 |          | 0.6                |
| 4121 | 9.81E-09 | 36.09                                                                 |          | 12.7               |
| 0621 | 1.02E-08 | 40.09                                                                 |          | 1.6                |
| 3743 | 1.04E-08 | 22.59                                                                 |          | 0.7                |
| 3033 | 1.09E-08 | 17.49                                                                 |          | 13.4               |
| 3133 | 1.21E-08 | 18.4                                                                  |          | 0.6                |
| 1891 | 1.25E-08 | 48.59                                                                 |          | 0.9                |
| 3451 | 1.26E-08 | 69.77                                                                 |          | 0.8                |
| 0937 | 1.34E-08 | 28.11                                                                 |          | 1.4                |
| 1984 | 1.50E-08 | 26.99                                                                 |          | 1.3                |
| 3116 | 1.74E-08 | 23.48                                                                 |          | 0.9                |
| 4025 | 2.31E-08 | 145.8                                                                 | 28.33    | 13.2               |
| 4164 | 2.54E-08 | 25.04                                                                 |          | 0.5                |
| 3268 | 2.66E-08 | 41.77                                                                 |          | 1.8                |
| 4118 | 2.74E-08 | 149.3                                                                 | 45.37    | 10.8               |
| 2446 | 2.78E-08 | 46.61                                                                 |          | 1.5                |
| 2384 | 2.80E-08 | 45.21                                                                 |          | 0.8                |
| 3128 | 2.91E-08 | 26.48                                                                 |          | 2.4                |
| 4135 | 3.15E-08 | 47.63                                                                 |          | 2.2                |
| 2959 | 3.51E-08 | 143.9                                                                 | 75.75    | 13.1               |
| 0762 | 3.70E-08 | 41.61                                                                 |          | 0.8                |
| 2421 | 4.10E-08 | 69.39                                                                 |          | 1.4                |
| 0709 | 4.11E-08 | 144.4                                                                 | 27.04    | 13.1               |
| 3616 | 4.63E-08 | 49.29                                                                 |          | 0.6                |
| 2599 | 6.61E-08 | 31.44                                                                 |          | 1.1                |
| 0335 | 7.34E-08 | 51.57                                                                 |          | 0.5                |
| 3694 | 9.10E-08 | 155.2                                                                 | 68.04    | 13.5               |
| 3713 | 9.58E-08 | 55.03                                                                 |          | 0.6                |
| 3217 | 9.95E-08 | 42.57                                                                 |          | 12                 |

|                                            |          |       |       |     |
|--------------------------------------------|----------|-------|-------|-----|
| mAb 1710<br>(Scally <i>et al.</i> , 2017)  | 7.01E-08 | 53.74 | 183.6 | 0.2 |
| mAb 1512<br>(Beutler <i>et al.</i> , 2022) | 2.85E-10 | 156.8 | 21.53 | ND  |

mAbs- monoclonal antibodies; ID- identification number; AUC- area under the curve; ND- not determined

**Appendix Table S4:** Live sporozoites binding and hepatocyte traversal inhibition

| ID   | VH   | mAbs   |                     | Binding affinity<br>K <sub>D</sub> (M) | Sporozoite binding (% average) |         | Traversal inhibition (% average)<br>100 µg/ml |
|------|------|--------|---------------------|----------------------------------------|--------------------------------|---------|-----------------------------------------------|
|      |      | VL     | Epitope specificity |                                        | 100 µg/ml                      | 1 µg/ml |                                               |
| 3393 | 3-21 | Vλ3-1  | Th2R/Th3R           | 5.11E-10                               | 0.8                            |         | 4.1                                           |
| 0566 | 3-21 | Vλ3-21 | Th2R/Th3R           | 5.70E-09                               | 0.4                            |         | -3.2                                          |
| 4121 | 3-30 | Vλ1-36 | Th2R/Th3R           | 9.81E-09                               | 0.7                            |         | 0.7                                           |
| 3743 | 3-9  | Vλ2-23 | Th2R/Th3R           | 1.04E-08                               | 0.6                            |         | 9.9                                           |
| 4135 | 3-21 | Vλ6-57 | Th2R/Th3R           | 3.15E-08                               | 0.6                            |         | -8.3                                          |
| 4025 | 4-61 | Vκ3-20 | RII+                | 2.31E-08                               | 1                              |         | 3.5                                           |
| 4164 | 3-7  | Vλ3-1  | Th2R/Th3R           | 2.54E-08                               | 0.7                            |         | -1.6                                          |
| 4118 | 3-23 | Vλ7-43 | RII+                | 2.74E-08                               | 0.5                            |         | 5.1                                           |
| 0709 | 3-48 | Vκ3-11 | RII+                | 4.11E-08                               | 0.6                            |         | -12.8                                         |
| 2152 | 3-23 | Vκ1-13 | ND                  | 1.64E-07                               | 1                              |         | 2                                             |
| 3764 | 3-33 | Vκ2-30 | C-linker            | 1.72E-07                               | 77                             | 0.9     | -12.8                                         |
| 1061 | 4-59 | Vλ1-47 | Linear peptide      | 1.93E-07                               | 0.9                            |         | -10.7                                         |
| 0590 | 1-3  | Vλ3-21 | ND                  | 2.45E-07                               | 0.6                            |         | -13.7                                         |
| 3750 | 1-3  | Vκ1-33 | ND                  | 4.17E-07                               | 0.8                            |         | 16.3                                          |
| 2449 | 3-9  | Vκ1-12 | ND                  | 5.04E-07                               | 0.7                            |         | 3.1                                           |

mAbs- monoclonal antibodies; ID- identification number; VH- Variable Ig heavy chain segment; VL- Variable Ig light chain segment; ND- not determined

**Appendix Table S5:** Statistical analysis for *in vivo* protection of 1961 mAb against mosquito bite challenge infection (Fig 4F).

|                   | <b>1961 (n=8)</b> | <b>317 (n=10)</b> |
|-------------------|-------------------|-------------------|
| <b>1710 (n=9)</b> | 0.0592            | <0.0001           |
| <b>1961 (n=8)</b> | -                 | 0.027             |

P-values of pair comparisons are indicated, Mantel - Cox log - rank test, N=2.

## Appendix Table S6: X-ray crystallography data collection and refinement data

| 3764 Fab - PfCSP <sub>281-294</sub>                            |                       |
|----------------------------------------------------------------|-----------------------|
| Beamline                                                       | APS-23-ID-B           |
| Wavelength (Å)                                                 | 1.033167              |
| Space group                                                    | P2 <sub>1</sub>       |
| Cell dimensions                                                |                       |
| a, b, c (Å)                                                    | 92.2, 66.7, 95.5      |
| α, β, γ (°)                                                    | 90, 113.4, 90         |
| Resolution (Å) <sup>a</sup>                                    | 40.0-2.36 (2.46-2.36) |
| No. molecules in ASU                                           | 2                     |
| No. observations                                               | 303,283 (34,515)      |
| No. unique observations                                        | 43,719 (5067)         |
| Multiplicity                                                   | 6.9 (6.7)             |
| R <sub>merge</sub> (%) <sup>b</sup>                            | 12.3 (63.4)           |
| R <sub>pim</sub> (%) <sup>c</sup>                              | 5.0 (26.1)            |
| <I/σ I>                                                        | 10.9 (1.8)            |
| CC <sub>1/2</sub>                                              | 99.7 (74.9)           |
| Completeness (%)                                               | 98.9 (98.6)           |
| Refinement statistics                                          |                       |
| Reflections used in refinement                                 | 43,695                |
| Reflections used for R <sub>free</sub>                         | 1995                  |
| Non-hydrogen atoms                                             | 7007                  |
| Macromolecules                                                 | 6718                  |
| Solvent                                                        | 289                   |
| R <sub>work</sub> <sup>d</sup> /R <sub>free</sub> <sup>e</sup> | 17.5 / 23.7           |
| Rms deviations from ideality                                   |                       |
| Bond lengths (Å)                                               | 0.007                 |
| Bond angle (°)                                                 | 0.93                  |
| Ramachandran plot                                              |                       |
| Favored regions (%)                                            | 97.6                  |
| Allowed regions (%)                                            | 2.3                   |
| Wilson B-value (Å <sup>2</sup> )                               | 43.7                  |
| B-factors (Å <sup>2</sup> )                                    |                       |
| Average                                                        | 44.5                  |
| Macromolecules                                                 | 44.5                  |
| Solvent                                                        | 44.3                  |

<sup>a</sup>Values in parentheses refer to the highest resolution bin.

<sup>b</sup> $R_{\text{merge}} = \frac{\sum hkl \sum i |I_{hkl,i} - \langle I_{hkl} \rangle|}{\sum hkl \langle I_{hkl} \rangle}$ .

<sup>c</sup> $R_{\text{pim}} = \frac{\sum hkl [1/(N-1)]^{1/2} \sum i |I_{hkl,i} - \langle I_{hkl} \rangle|}{\sum hkl \langle I_{hkl} \rangle}$ .

<sup>d</sup> $R_{\text{work}} = \frac{(\sum | |F_o| - |F_c| |)}{(\sum | |F_o| )}$  for all data except as indicated in footnote <sup>e</sup>.

<sup>e</sup>5% of data was used for the R<sub>free</sub> calculation.
